# Supplementary material for: Facile synthesis of highly fluorescent free-standing films comprising graphitic carbon nitride (g-C3N4) nanolayers
Source: Royal Society of Chemistry journal article supplement (doi:10.1039/c9nj05108b), 2020-01-01
Supplement: c9nj05108b1.pdf [file c9nj05108b1.pdf]

## Facile synthesis of highly fluorescent free-standing films comprising of graphitic carbon nitride (g-C<sub>3</sub>N<sub>4</sub>) nanolayers

Ram Manohar Yadav<sup>a,b</sup> \*, Rajesh Kumar<sup>c</sup>, Amir Aliyan<sup>d</sup>, Pramod S. Dobal<sup>a</sup>, Santoshkumar Biradar<sup>b</sup>, Robert Vajtai<sup>b,e</sup>, Dinesh Pratap Singh<sup>f</sup>, Angel A. Marti<sup>b,g,\*</sup> and Pulickel M. Ajayan<sup>b,g,\*</sup>

<sup>a</sup> Department of Physics, VSSD College Kanpur, India-208002

<sup>b</sup> Department of Materials Science and NanoEngineering, Rice University, Houston, TX, USA-77005

<sup>c</sup> Department of Electrical and Electronic Information Engineering, Toyohashi University of Technology, 1-1 Hibarigaoka, Tempaku-cho, Toyohashi, Aichi, 441-8580, Japan

<sup>d</sup> Pasargad Institute for Advanced Innovative Solutions (PIAIS), 1991633361, Tehran, Iran

<sup>e</sup> Interdisciplinary Excellence Centre, Department of Applied and Environmental Chemistry, University of Szeged, Rerrich Béla tér 1, Szeged, Hungary

<sup>f</sup> Department of Physics, University of Santiago, Santiago-9170124, Chile

<sup>g</sup> Department of Chemistry, Rice University, Houston, TX, USA-77005

---

**\*Corresponding authors:** [rmanohar28@gmail.com](mailto:rmanohar28@gmail.com) (R.M. Yadav),  
[amarti@rice.edu](mailto:amarti@rice.edu) (Prof. A.A Marti)  
[ajayan@rice.edu](mailto:ajayan@rice.edu) (Prof. P.M. Ajayan)

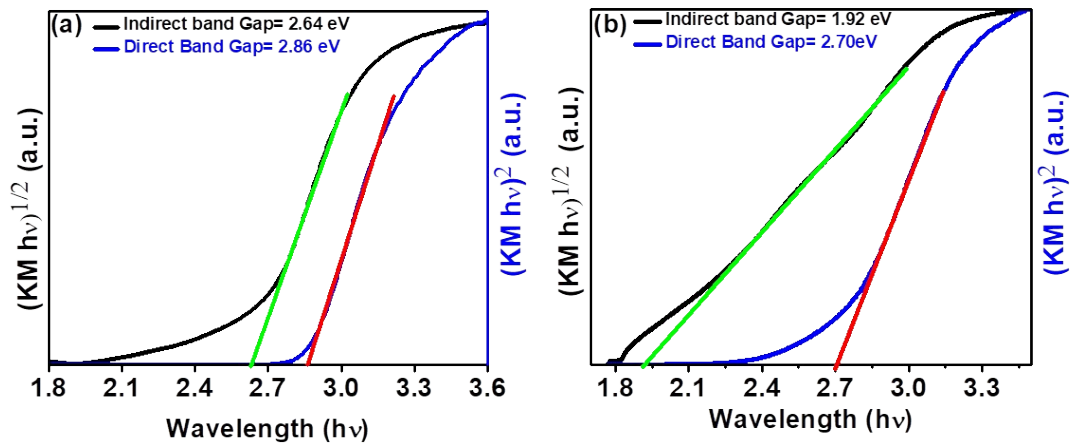

**Fig. S1:** Band gap Calculations using modified Kubelka–Munk (K–M) function (a) for g-C<sub>3</sub>N<sub>4</sub> film and (b) g-C<sub>3</sub>N<sub>4</sub> powder.

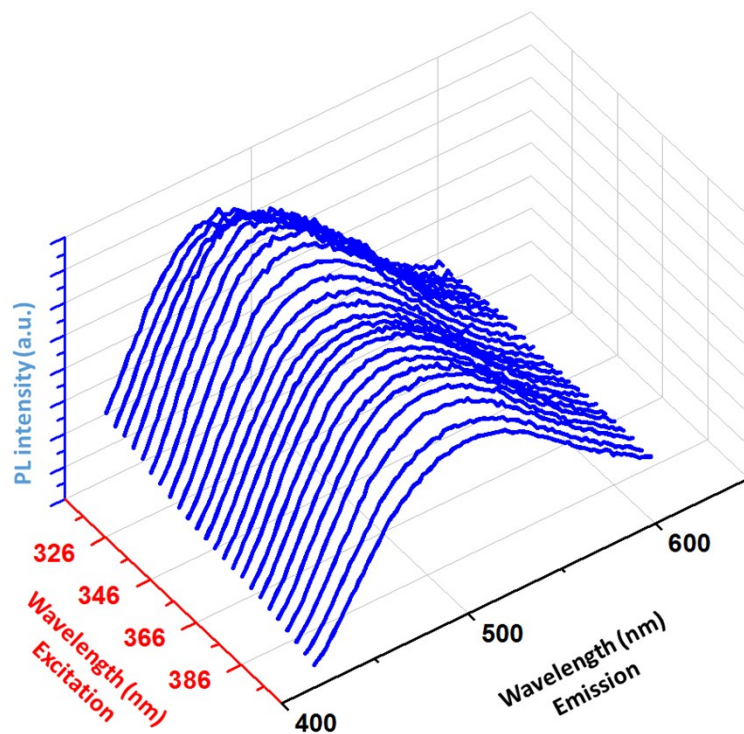

**Fig. S2** Excitation dependent PL emission spectra of g-C<sub>3</sub>N<sub>4</sub> powder.

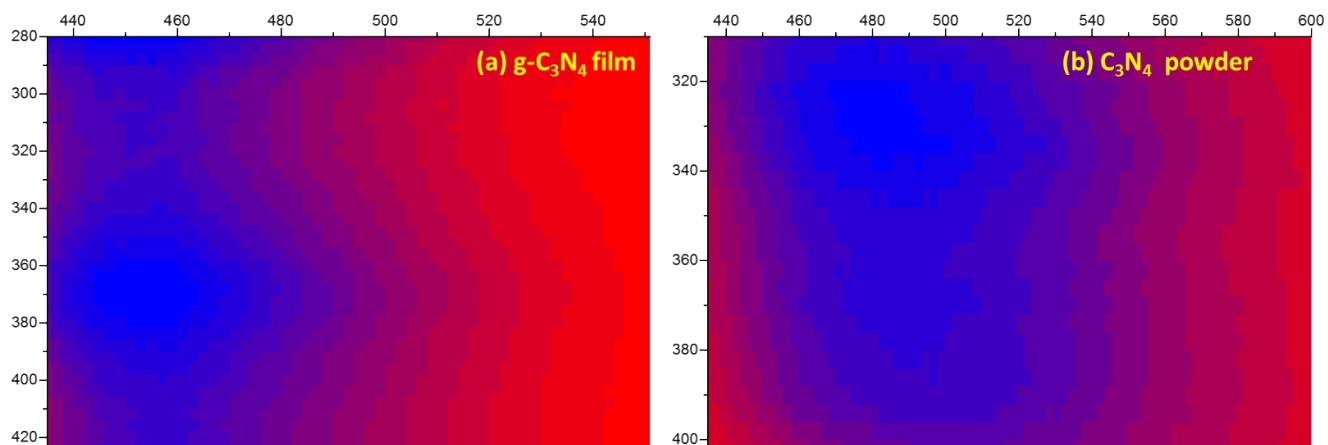

**Fig. S3:** Emission profile of (a)  $\text{C}_3\text{N}_4$  film and (b)  $g\text{-C}_3\text{N}_4$  powder.

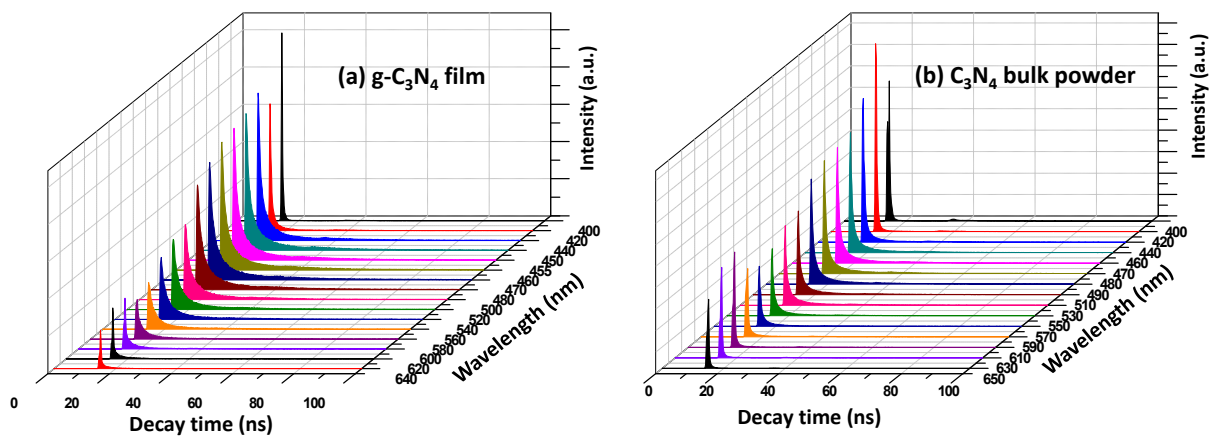

**Fig. S4** Fluorescence decay spectra of (a)  $g\text{-C}_3\text{N}_4$  film and (b)  $g\text{-C}_3\text{N}_4$  powder at different excitation wavelength.
